# Supplementary material for: Evolution of disposable bamboo chopsticks into uniform carbon fibers: a smart strategy to fabricate sustainable anodes for Li-ion batteries
Source: Royal Society of Chemistry journal article supplement (doi:10.1039/c4ee00602j), 2014-01-01
Supplement: c4ee00602j1.pdf [file c4ee00602j1.pdf]

Cite this: DOI: 10.1039/c0xx00000x

ARTICLE TYPE

www.rsc.org/xxxxxx

## Evolution of disposable bamboo chopsticks into uniform carbon fibers: A smart strategy to fabricate sustainable anodes for Li-ion batteries

Jian Jiang,<sup>a</sup> Jianhui Zhu,<sup>a</sup> Wei Ai,<sup>a</sup> Zhanxi Fan,<sup>b</sup> Xiaonan Shen,<sup>a</sup> Chenji Zou,<sup>a</sup> Jinping Liu,<sup>d</sup> Hua  
Zhang<sup>b</sup> and Ting Yu<sup>\*a,c</sup>

10

<sup>a</sup> Division of Physics and Applied Physics, School of Physical and Mathematical Sciences, Nanyang Technological University, 637371, Singapore. E-mail: [YuTing@ntu.edu.sg](mailto:YuTing@ntu.edu.sg);

<sup>b</sup> School of Materials Science and Engineering, Nanyang Technological University, 639798, Singapore;

15 <sup>c</sup> Graphene Research Centre, National University of Singapore, 117546, Singapore.

<sup>d</sup> Institute of Nanoscience and Nanotechnology, Department of Physics, Central China Normal University, Wuhan, 430079, Hubei, P.R. China.

20

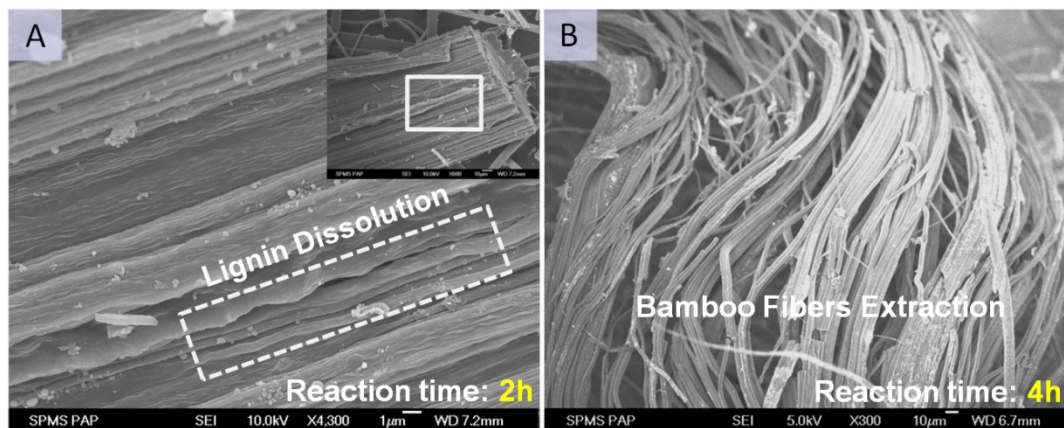

25 **Fig. S1** SEM images of the intermediate products fabricated in 3M KOH solution with a hydrothermal reaction time of (A) 2h and (B) 4h, respectively.

30

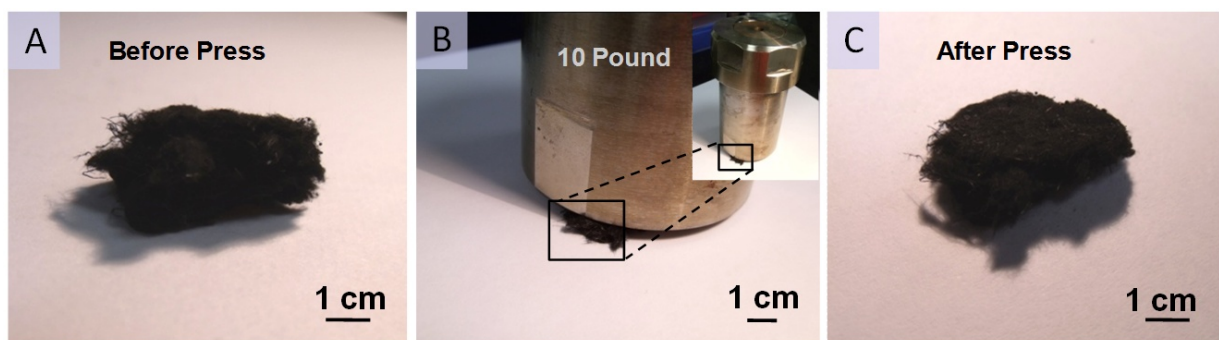

**Fig. S2** Optical images showing the attained carbon fibers possess good toughness. No visible changes appear even when fiber samples suffer from a 10-pound weight press.

10

15

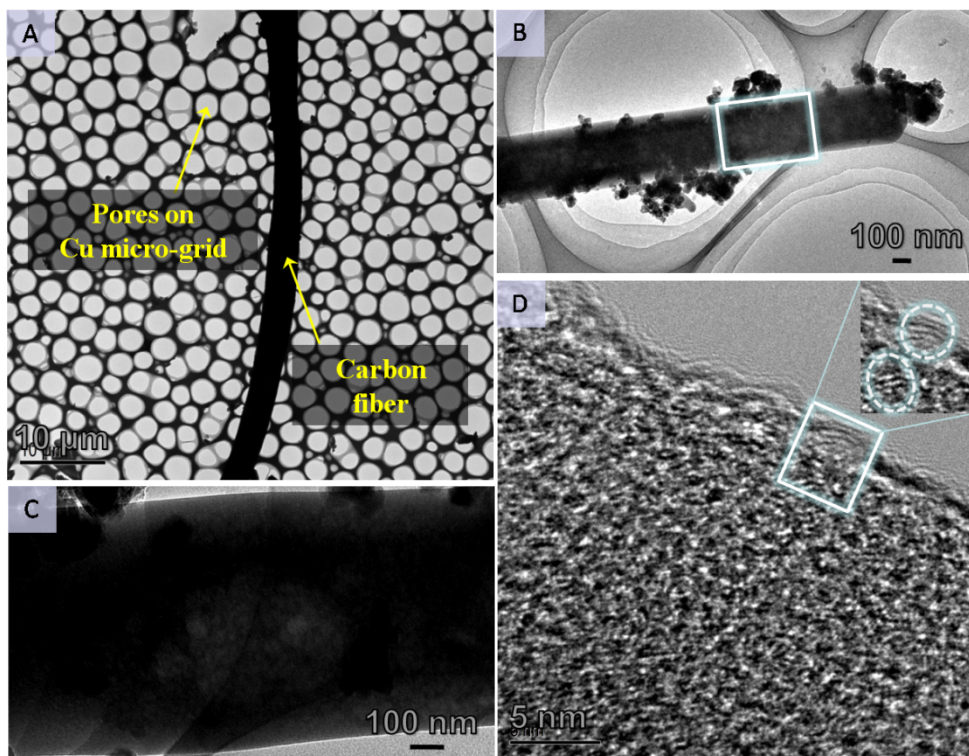

**Fig. S3** TEM/HRTEM observations toward the produced carbon fibers.

20

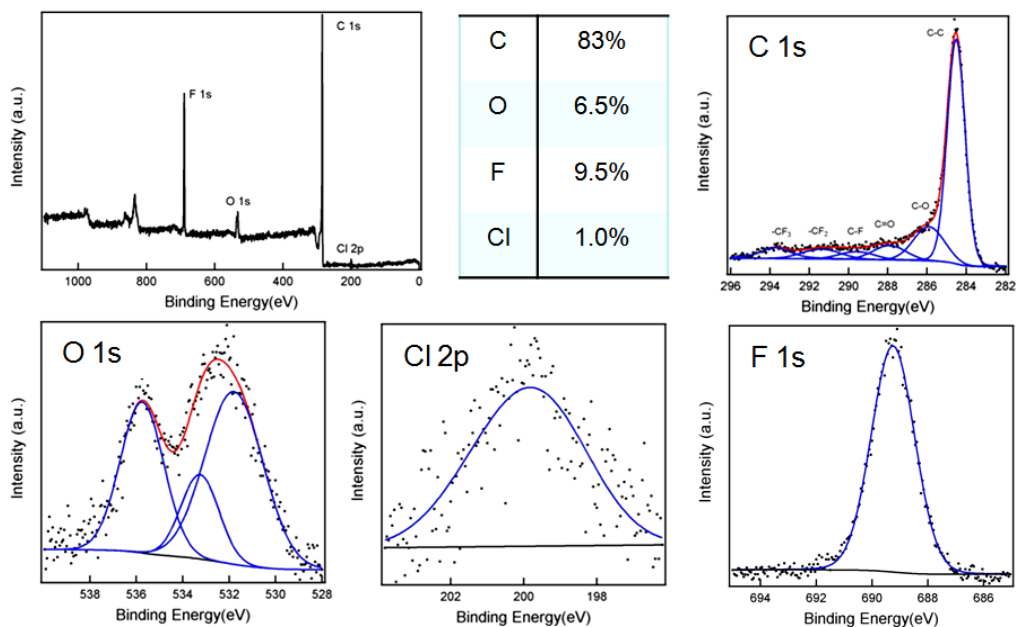

**Fig. S4** XPS spectra obtained from the evolved carbon fibers.

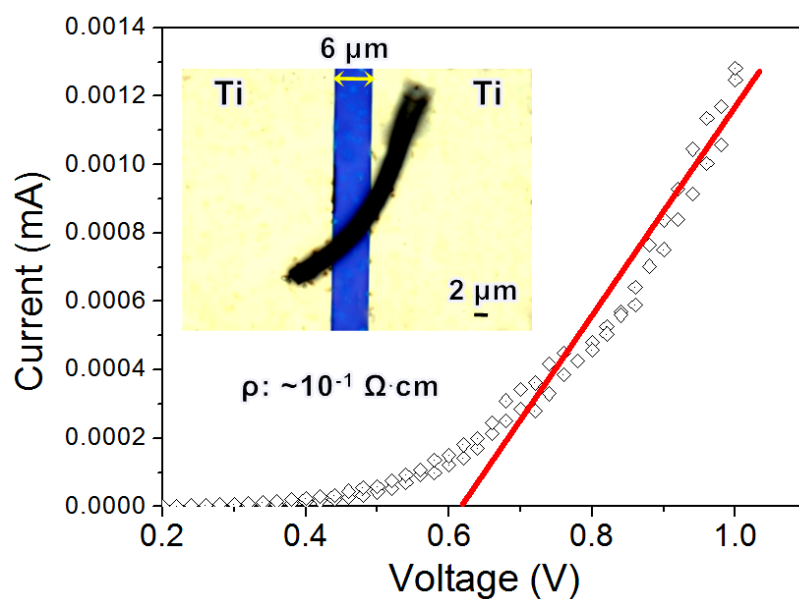

**Fig. S5** Electrical performance of a single carbon fiber.

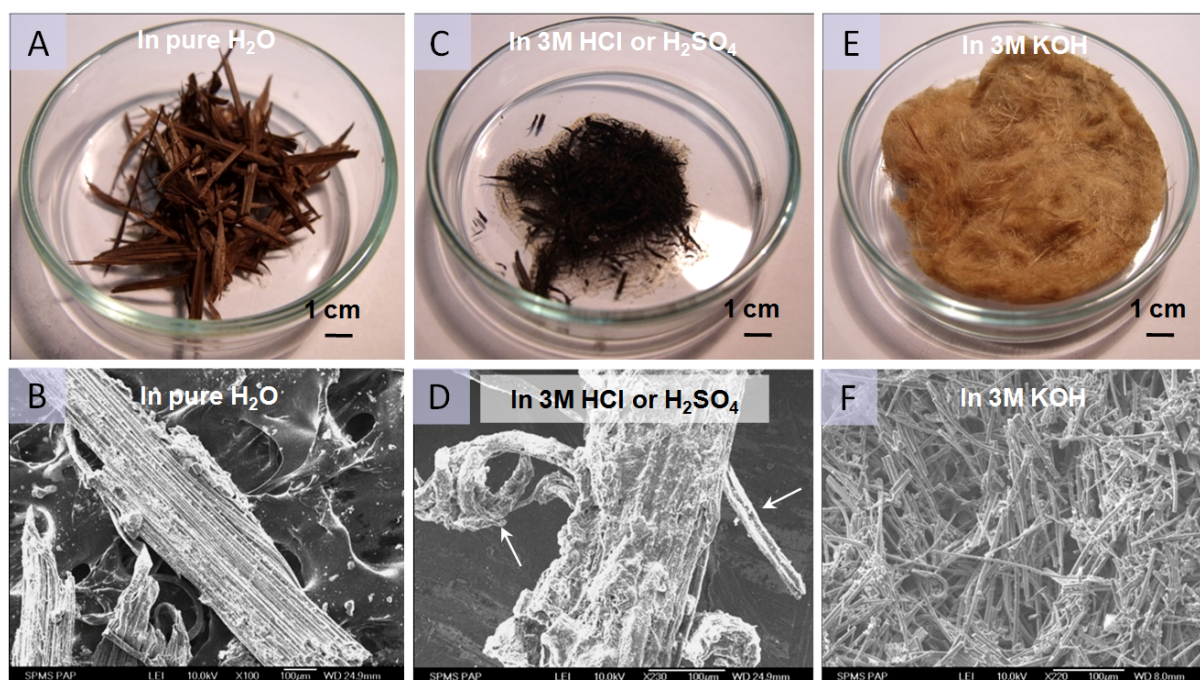

**5 Fig. S6** Optical and SEM images of samples made by a hydrothermal treatment in different atmospheres: (A, B) in pure H<sub>2</sub>O; (C, D) in 3M HCl or H<sub>2</sub>SO<sub>4</sub>; (E, F) in 3M KOH, respectively.

10

| Items                                                                           | Anodic material cost for 10000 coin-type cells<br>(Assuming each cell contains ~100 mg active anodic materials) |                                                               |
|---------------------------------------------------------------------------------|-----------------------------------------------------------------------------------------------------------------|---------------------------------------------------------------|
|                                                                                 | For chopsticks-derived carbon fibers                                                                            | For commercial battery-grade graphite                         |
| Raw Materials                                                                   | <b>0</b><br>(Chopsticks are all recycled from wastes)                                                           | <b>\$ 27</b><br>(Unit Price of unprocessed graphite: \$12/lb) |
| Consumables in fabrication processes<br>(e.g., KOH, Ar gas, water, acids, etc.) | <b>\$ 21</b><br>(Used for fibers extraction)<br>(Unit Price of KOH for industrial use: \$ 0.42/lb)              | <b>\$ 6-12</b><br>(Used for graphite processing)              |
| Energy consumption in fabrication<br>processes (e.g., electricity, etc.)        | <b>\$ 9-20</b><br>(Used for fibers extraction & calcination)                                                    | <b>\$ 6-15</b><br>(Used for graphite processing)              |
| Total cost                                                                      | <b>\$ 30-41</b>                                                                                                 | <b>\$ 39-54</b>                                               |

**Table S1** Cost comparison of anodic materials made from chopsticks-derived carbon fibers and commercially used graphite, respectively

15



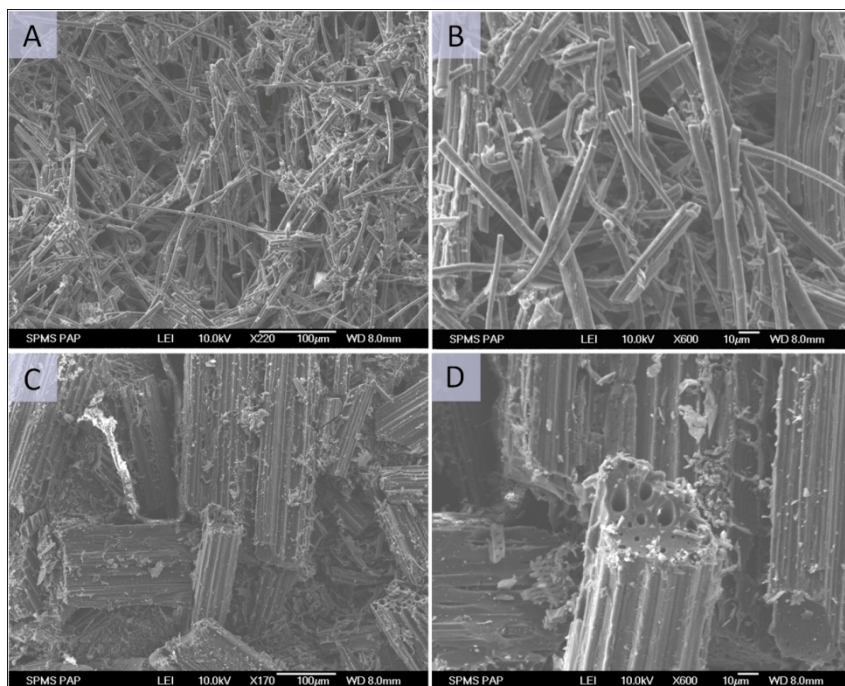

**5 Fig. S7** SEM observations on samples tested as the anode of LIBs: (A, B) carbon fibers; (C, D) bulky bamboo carbons.

10

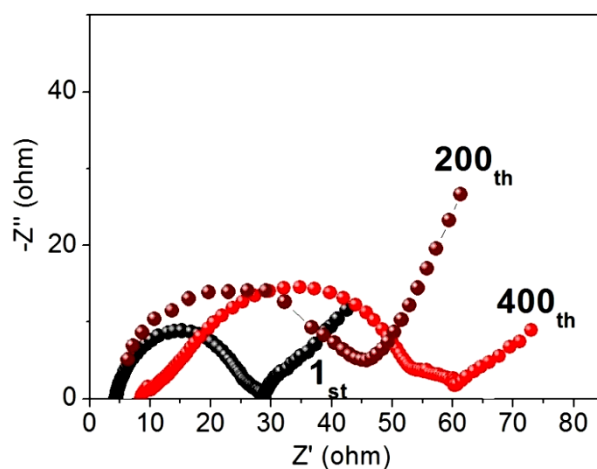

**Fig. S8** EIS spectra of the produced carbon fibers upon cycling.

15

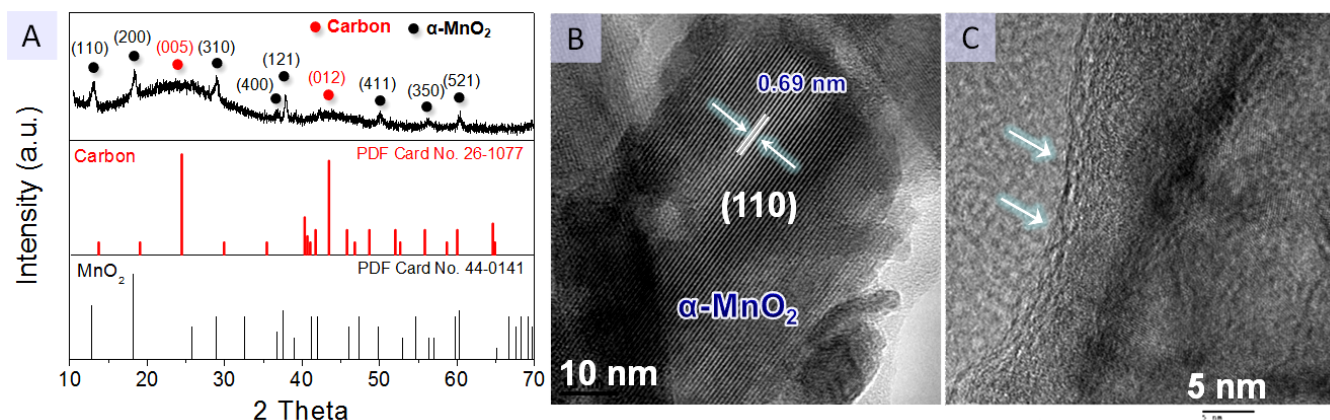

**Fig. S9** (A) XRD pattern of C/MnO<sub>2</sub> NWs/carbon fibers hybrid. (B-C) TEM/HRTEM images of the hybrid product. TEM observation in Fig. S6 (C) indicates a carbon layer coating on MnO<sub>2</sub> surface.

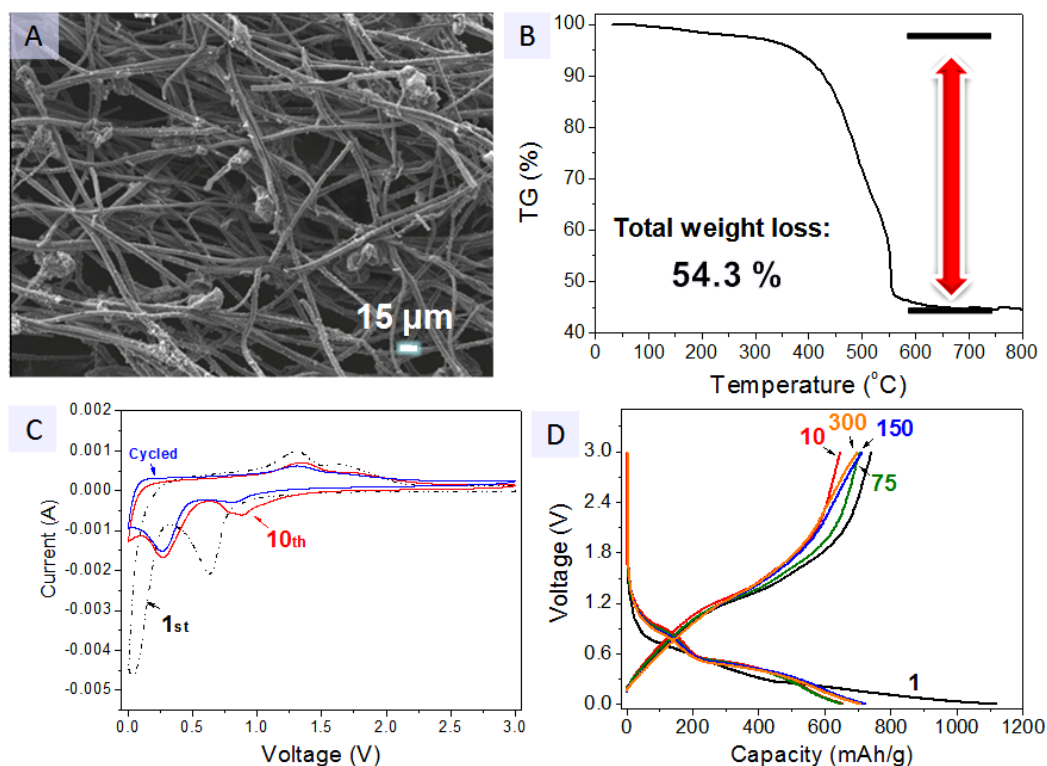

**Fig. S10** (A) Large-scale SEM observation, (B) TGA plot, (C) CV curves and (D) charge-discharge profiles of the C/MnO<sub>2</sub> NWs/carbon fibers hybrid.
